# Supplementary material
Source: PubMed Central journal article supplement (PMC4883648)
Supplement: NIHMS68235-supplement-Supplementary_information.pdf [file NIHMS68235-supplement-Supplementary_information.pdf]

# Supplementary information

## **Glycoprofiling as a novel tool in serological assays of systemic sclerosis: A comparative study with three bioanalytical methods**

*Ludmila Klukova<sup>1</sup>, Tomas Bertok<sup>1</sup>, Miroslava Petrikova<sup>1</sup>, Alena Sediva<sup>1</sup>, Danica Mislovicova<sup>1</sup>, Jaroslav Katrlík<sup>1</sup>, Alica Vikartovska<sup>1</sup>, Jaroslav Filip<sup>1</sup>, Peter Kasak<sup>2,3</sup>, Anita Andicsová-Eckstein<sup>4</sup>, Jaroslav Mosnáček<sup>4</sup>, Jozef Rovenský<sup>5</sup>, Richard Imrich<sup>6</sup>, Jan Tkac<sup>1\*</sup>*

<sup>1</sup> Department of Glycobiotechnology, Institute of Chemistry, Slovak Academy of Sciences, Dúbravská cesta 9, Bratislava 845 38, Slovakia;

<sup>2</sup> Center for Advanced Materials, Qatar University, P.O. Box 2713 Doha, Qatar;

<sup>3</sup> Department for Biomaterial Research, Polymer Institute, Slovak Academy of Sciences, Dúbravská cesta 9, Bratislava 845 38, Slovakia;

<sup>4</sup> Department of Synthesis and Characterization of Polymers, Polymer Institute, Slovak Academy of Sciences, Dúbravská cesta 9, Bratislava 845 38, Slovakia;

<sup>5</sup> National Institute of Rheumatic Diseases, Nábr. I. Krásku 4, Piešťany 921 12, Slovakia;

<sup>6</sup> Laboratory of Human Endocrinology, Institute of Experimental Endocrinology, Slovak Academy of Sciences, Vlárská 3, Bratislava 833 06, Slovakia.

\* Corresponding author: [Jan.Tkac@savba.sk](mailto:Jan.Tkac@savba.sk), Tel.: +421 2 5941 0263, Fax: +421 2 5941 0222

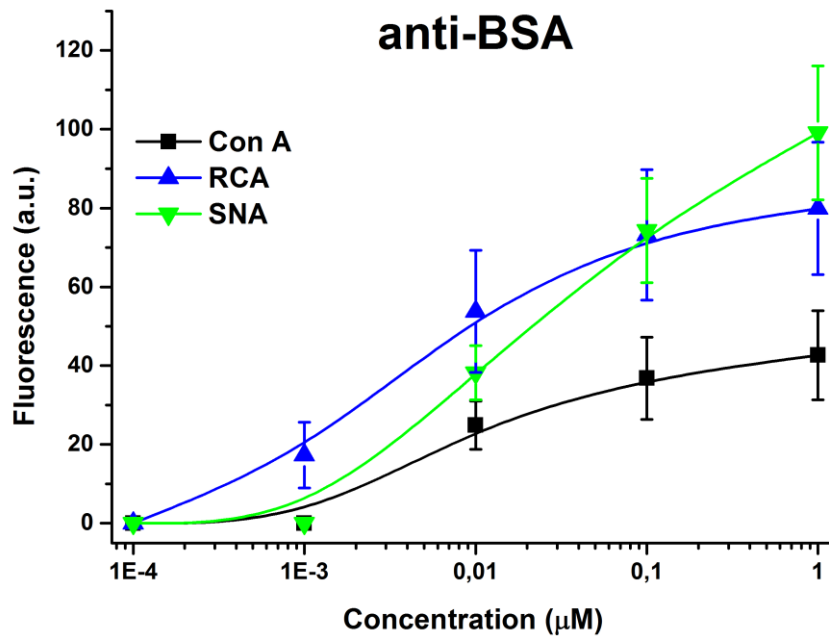

**Figure S1:** Calibration curves for anti-BSA using lectin microarrays. Three different lectins Con A, RCA and SNA were applied in calibration providing high signal, while other lectins provided low affinity towards glycan moiety present on anti-BSA antibody.

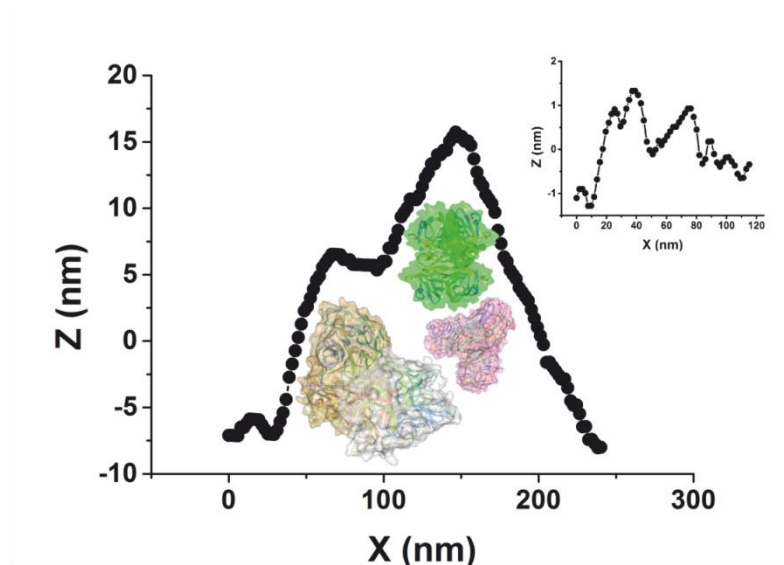

**Figure S2:** A height profile of one spot on the microarray slide modified with INV, Con A-biotin and CF555 streptavidin conjugated fluorescent label. Inset shows a profile on a bare microarray slide. Under the height profile, INV (brown and white), Con A (purple) and streptavidin (green) were inserted. The image was drawn to real scale. The convolution effect of the AFM technique has to be taken into account.
